# Supplementary material
Source: HighWire-hosted journal article supplement (https://ijssurgery.com/content/17/6/787)
Supplement: inline-supplementary-material-1 [file inline-supplementary-material-1.docx]

Supplemental Table 1: ICD-9 and ICD-10 codes used to characterize primary outcomes of interest

| Primary outcome of interest | ICD-9/ICD-10 Codes |
| --- | --- |
| Deep vein thrombosis | ICD-9-D-4532, ICD-9-D-4533, ICD-9-D-4534, ICD-9-D-45382, ICD-9-D-45384, ICD-9-D-45358, ICD-9-D-45386, ICD-10-D-I26:ICD10-D-I2699 |
| Pulmonary embolism | ICD-9-D-4151: ICD-9-D-4159, ICD-10-D-I26:ICD-10-I269 |
| Blood transfusion | ICD-9-P-9904,ICD-10-P-3023,ICD-10-P-30230AZ,ICD-10-P-30230G0,ICD-10-P-30230G2,ICD-10-P-30230G3,ICD-10-P-30230G4,ICD-10-P-30230H0,ICD-10-P-30230H1,ICD-10-P-30230J0,ICD-10-P-30230J1,ICD-10-P-30230K0,ICD-10-P-30230K1,ICD-10-P-30230L0,ICD-10-P-30230L1,ICD-10-P-30230M0,ICD-10-P-30230M1,ICD-10-P-30230N0,ICD-10-P-30230N1,ICD-10-P-30230P0,ICD-10-P-30230P1,ICD-10-P-30230Q0,ICD-10-P-30230Q1,ICD-10-P-30230R0,ICD-10-P-30230R1,ICD-10-P-30230S0,ICD-10-P-30230S1,ICD-10-P-30230T0,ICD-10-P-30230T1,ICD-10-P-30230V0,ICD-10-P-30230V1,ICD-10-P-30230W0,ICD-10-P-30230W1,ICD-10-P-30230X0,ICD-10-P-30230X2,ICD-10-P-30230X3,ICD-10-P-30230X4,ICD-10-P-30230Y0,ICD-10-P-30230Y2,ICD-10-P-30230Y3,ICD-10-P-30230Y4,ICD-10-P-30233AZ,ICD-10-P-30233G0,ICD-10-P-30233G2,ICD-10-P-30233G3,ICD-10-P-30233G4,ICD-10-P-30233H0,ICD-10-P-30233H1,ICD-10-P-30233J0,ICD-10-P-30233J1,ICD-10-P-30233K0,ICD-10-P-30233K1,ICD-10-P-30233L0,ICD-10-P-30233L1,ICD-10-P-30233M0,ICD-10-P-30233M1,ICD-10-P-30233N0,ICD-10-P-30233N1,ICD-10-P-30233P0,ICD-10-P-30233P1,ICD-10-P-30233Q0,ICD-10-P-30233Q1,ICD-10-P-30233R0,ICD-10-P-30233R1,ICD-10-P-30233S0,ICD-10-P-30233S1,ICD-10-P-30233T0,ICD-10-P-30233T1,ICD-10-P-30233V0,ICD-10-P-30233V1,ICD-10-P-30233W0,ICD-10-P-30233W1,ICD-10-P-30233X0,ICD-10-P-30233X2,ICD-10-P-30233X3,ICD-10-P-30233X4,ICD-10-P-30233Y0,ICD-10-P-30233Y2,ICD-10-P-30233Y3,ICD-10-P-30233Y4,ICD-10-P-30240AZ,ICD-10-P-30240G0,ICD-10-P-30240G2,ICD-10-P-30240G3,ICD-10-P-30240G4,ICD-10-P-30240H0,ICD-10-P-30240H1,ICD-10-P-30240J0,ICD-10-P-30240J1,ICD-10-P-30240K0,ICD-10-P-30240K1,ICD-10-P-30240L0,ICD-10-P-30240L1,ICD-10-P-30240M0,ICD-10-P-30240M1,ICD-10-P-30240N0,ICD-10-P-30240N1,ICD-10-P-30240P0,ICD-10-P-30240P1,ICD-10-P-30240Q0,ICD-10-P-30240Q1,ICD-10-P-30240R0,ICD-10-P-30240R1,ICD-10-P-30240S0,ICD-10-P-30240S1,ICD-10-P-30240T0,ICD-10-P-30240T1,ICD-10-P-30240V0,ICD-10-P-30240V1,ICD-10-P-30240W0,ICD-10-P-30240W1,ICD-10-P-30240X0,ICD-10-P-30240X2,ICD-10-P-30240X3,ICD-10-P-30240X4,ICD-10-P-30240Y0,ICD-10-P-30240Y2,ICD-10-P-30240Y3,ICD-10-P-30240Y4,ICD-10-P-30243AZ,ICD-10-P-30243G0,ICD-10-P-30243G2,ICD-10-P-30243G3,ICD-10-P-30243G4,ICD-10-P-30243H0,ICD-10-P-30243H1,ICD-10-P-30243J0,ICD-10-P-30243J1,ICD-10-P-30243K0,ICD-10-P-30243K1,ICD-10-P-30243L0,ICD-10-P-30243L1,ICD-10-P-30243M0,ICD-10-P-30243M1,ICD-10-P-30243N0,ICD-10-P-30243N1,ICD-10-P-30243P0,ICD-10-P-30243P1,ICD-10-P-30243Q0,ICD-10-P-30243Q1,ICD-10-P-30243R0,ICD-10-P-30243R1,ICD-10-P-30243S0,ICD-10-P-30243S1,ICD-10-P-30243T0,ICD-10-P-30243T1,ICD-10-P-30243V0,ICD-10-P-30243V1,ICD-10-P-30243W0,ICD-10-P-30243W1,ICD-10-P-30243X0,ICD-10-P-30243X2,ICD-10-P-30243X3,ICD-10-P-30243X4,ICD-10-P-30243Y0,ICD-10-P-30243Y2,ICD-10-P-30243Y3,ICD-10-P-30243Y4,ICD-10-P-30250G0,ICD-10-P-30250G1,ICD-10-P-30250H0,ICD-10-P-30250H1,ICD-10-P-30250J0,ICD-10-P-30250J1,ICD-10-P-30250K0,ICD-10-P-30250K1,ICD-10-P-30250L0,ICD-10-P-30250L1,ICD-10-P-30250M0,ICD-10-P-30250M1,ICD-10-P-30250N0,ICD-10-P-30250N1,ICD-10-P-30250P0,ICD-10-P-30250P1,ICD-10-P-30250Q0,ICD-10-P-30250Q1,ICD-10-P-30250R0,ICD-10-P-30250R1,ICD-10-P-30250S0,ICD-10-P-30250S1,ICD-10-P-30250T0,ICD-10-P-30250T1,ICD-10-P-30250V0,ICD-10-P-30250V1,ICD-10-P-30250W0,ICD-10-P-30250W1,ICD-10-P-30250X0,ICD-10-P-30250X1,ICD-10-P-30250Y0,ICD-10-P-30250Y1,ICD-10-P-30253G0,ICD-10-P-30253G1,ICD-10-P-30253H0,ICD-10-P-30253H1,ICD-10-P-30253J0,ICD-10-P-30253J1,ICD-10-P-30253K0,ICD-10-P-30253K1,ICD-10-P-30253L0,ICD-10-P-30253L1,ICD-10-P-30253M0,ICD-10-P-30253M1,ICD-10-P-30253N0,ICD-10-P-30253N1,ICD-10-P-30253P0,ICD-10-P-30253P1,ICD-10-P-30253Q0,ICD-10-P-30253Q1,ICD-10-P-30253R0,ICD-10-P-30253R1,ICD-10-P-30253S0,ICD-10-P-30253S1,ICD-10-P-30253T0,ICD-10-P-30253T1,ICD-10-P-30253V0,ICD-10-P-30253V1,ICD-10-P-30253W0,ICD-10-P-30253W1,ICD-10-P-30253X0,ICD-10-P-30253X1,ICD-10-P-30253Y0,ICD-10-P-30253Y1,ICD-10-P-30260G0,ICD-10-P-30260G1,ICD-10-P-30260H0,ICD-10-P-30260H1,ICD-10-P-30260J0,ICD-10-P-30260J1,ICD-10-P-30260K0,ICD-10-P-30260K1,ICD-10-P-30260L0,ICD-10-P-30260L1,ICD-10-P-30260M0,ICD-10-P-30260M1,ICD-10-P-30260N0,ICD-10-P-30260N1,ICD-10-P-30260P0,ICD-10-P-30260P1,ICD-10-P-30260Q0,ICD-10-P-30260Q1,ICD-10-P-30260R0,ICD-10-P-30260R1,ICD-10-P-30260S0,ICD-10-P-30260S1,ICD-10-P-30260T0,ICD-10-P-30260T1,ICD-10-P-30260V0,ICD-10-P-30260V1,ICD-10-P-30260W0,ICD-10-P-30260W1,ICD-10-P-30260X0,ICD-10-P-30260X1,ICD-10-P-30260Y0,ICD-10-P-30260Y1,ICD-10-P-30263G0,ICD-10-P-30263G1,ICD-10-P-30263H0,ICD-10-P-30263H1,ICD-10-P-30263J0,ICD-10-P-30263J1,ICD-10-P-30263K0,ICD-10-P-30263K1,ICD-10-P-30263L0,ICD-10-P-30263L1,ICD-10-P-30263M0,ICD-10-P-30263M1,ICD-10-P-30263N0,ICD-10-P-30263N1,ICD-10-P-30263P0,ICD-10-P-30263P1,ICD-10-P-30263Q0,ICD-10-P-30263Q1,ICD-10-P-30263R0,ICD-10-P-30263R1,ICD-10-P-30263S0,ICD-10-P-30263S1,ICD-10-P-30263T0,ICD-10-P-30263T1,ICD-10-P-30263V0,ICD-10-P-30263V1,ICD-10-P-30263W0,ICD-10-P-30263W1,ICD-10-P-30263X0,ICD-10-P-30263X1,ICD-10-P-30263Y0,ICD-10-P-30263Y1,ICD-10-P-30273H1,ICD-10-P-30273J1,ICD-10-P-30273K1,ICD-10-P-30273L1,ICD-10-P-30273M1,ICD-10-P-30273N1,ICD-10-P-30273P1,ICD-10-P-30273Q1,ICD-10-P-30273R1,ICD-10-P-30273S1,ICD-10-P-30273T1,ICD-10-P-30273V1,ICD-10-P-30273W1,ICD-10-P-30277H1,ICD-10-P-30277J1,ICD-10-P-30277K1,ICD-10-P-30277L1,ICD-10-P-30277M1,ICD-10-P-30277N1,ICD-10-P-30277P1,ICD-10-P-30277Q1,ICD-10-P-30277R1,ICD-10-P-30277S1,ICD-10-P-30277T1,ICD-10-P-30277V1,ICD-10-P-30277W1,ICD-10-P-30280B1,ICD-10-P-30283B1 |
| Surgical site infection | ICD-10-D-T8149XA, ICD-9-D-99859,  ICD-10-D-T8141XA, ICD-10-D-T8142XA |
| Wound dehiscence | ICD-9-D-99830, ICD-9-D-99831, ICD-9-D-99832, ICD-9-D-99833, ICD-10-D-T8130XA, ICD-10-D-T8130XD, ICD-10-D-8130XS, ICD-10-D-T8131XA, ICD-10-D-T831XD, ICD-10-D-T8131XS, ICD-10-D-T8132XA, ICD-10-D-T8312XD, ICD-10-D-T8132XS, ICD-10-D-T8133XA, ICD-10-D-T8133XD, ICD-10-D-T8133XS |
| Hardware malfunction | ICD-9-D-99649, ICD-9-D-99640, ICD-10-D-T84216A, ICD-10-D-T84418A, ICD-10-D-T8489XA,  ICD-10-D-T849XXA, ICD-10-D-T84226A,  ICD-10-D-T84296A |
